# Supplementary material for: Heat Treatment Augments Antigen Detection of Dirofilaria immitis in Apparently Healthy Companion Dogs (3.8% to 7.3%): Insights from a Large-Scale Nationwide Survey across the United States
Source: MDPI journal article supplement (doi:10.3390/pathogens13010056), 2024-01-06
Supplement: s1 [file s1]

**Table S1.** Dogs identified to be HW antigen after heat treatment on sera.

| <b>9</b> | <b>Age (year)</b> | <b>Sex</b> | <b>Breed</b>                   | <b>State</b> |
|----------|-------------------|------------|--------------------------------|--------------|
| 2022     | 6                 | Female     | German Shepherd Mix            | AL           |
| 2022     | 1                 | Male       | Bichon Frise                   | AL           |
| 2022     | 3                 | Female     | German Shepherd                | FL           |
| 2022     | 6                 | Female     | Boxer                          | FL           |
| 2022     | 10                | Male       | Papillon                       | MA           |
| 2022     | 0.58              | Female     | German Shepherd                | CA           |
| 2022     | 0.58              | Male       | German Shepherd                | CA           |
| 2022     | 8                 | Male       | German Shepherd                | AL           |
| 2022     | 4                 | Male       | Labrador Retriever Mix         | FL           |
| 2022     | 1                 | Male       | Doberman Pinscher              | CA           |
| 2022     | 4                 | Male       | Yorkshire Terrier              | CA           |
| 2022     | 13                | Female     | Portuguese Water Dog           | TX           |
| 2022     | 0.58              | Male       | Bichon Frise                   | CA           |
| 2022     | 0.33              | Female     | Bichon Frise                   | CA           |
| 2022     | 11                | Female     | Labrador Retriever             | AL           |
| 2022     | 9                 | Male       | Chihuahua Mix                  | HI           |
| 2022     | 2                 | Male       | Australian Shepherd            | GA           |
| 2022     | 1                 | Female     | Labrador Retriever             | AL           |
| 2022     | 6                 | Male       | Maltese                        | CA           |
| 2022     | 3                 | Male       | Pembroke Welsh Corgi           | CA           |
| 2022     | 5                 | Male       | German Shepherd Mix            | LA           |
| 2022     | 7                 | Female     | Pembroke Welsh Corgi           | CA           |
| 2021     | 1.5               | Female     | Papillon                       | CA           |
| 2021     | 5                 | Male       | Plott Hound                    | GA           |
| 2021     | 4.66              | Male       | Australian Shepherd            | HI           |
| 2021     | 2                 | Female     | American Eskimo                | CA           |
| 2021     | 16                | Male       | Golden Retriever               | AL           |
| 2021     | 4                 | Male       | Australian Shepherd            | GA           |
| 2021     | 2                 | Male       | Golden Retriever               | PA           |
| 2021     | 0.83              | Male       | Shiba Inu                      | CA           |
| 2021     | 2                 | Female     | Labrador Retriever Mix         | VA           |
| 2021     | 11.33             | Female     | Dachshund Mix                  | IL           |
| 2021     | 15                | Male       | Dachshund                      | PA           |
| 2021     | 6                 | Female     | Japanese Chin                  | PA           |
| 2021     | 10                | Male       | Cavalier King Charles Spaniel  | PA           |
| 2021     | 3                 | Male       | Rat Terrier                    | PA           |
| 2021     | 2                 | Male       | Labrador Retriever             | PA           |
| 2021     | 13                | Male       | Toy Poodle                     | FL           |
| 2021     | 15                | Female     | Chihuahua Mix                  | CA           |
| 2021     | 6.5               | Male       | Cocker Spaniel                 | WA           |
| 2021     | 4                 | Male       | American Bulldog               | PA           |
| 2021     | 7                 | Female     | Poodle Mix                     | AL           |
| 2021     | 6.5               | Female     | American Staffordshire Terrier | FL           |
| 2021     | 1                 | Female     | Boxer Mix                      | CA           |
| 2021     | 12.91             | Female     | Terrier Mix                    | PA           |
| 2021     | 1                 | Female     | Chihuahua Mix                  | HI           |
| 2021     | 5                 | Female     | Chihuahua Mix                  | HI           |
| 2021     | 10                | Female     | Yorkshire Terrier              | CA           |
| 2021     | 1.25              | Female     | Scottish Terrier               | TX           |
| 2021     | 4                 | Female     | Schnauzer                      | AL           |
| 2021     | 1                 | Male       | Shiba Inu                      | NY           |
| 2021     | 0.5               | Male       | Shih Tzu                       | NV           |
| 2021     | 0.41              | Female     | German Shepherd                | NV           |
| 2021     | 0.41              | Male       | Caucasian Mountain Dog         | NV           |
| 2021     | 0.33              | Male       | Alaskan Malamute               | NV           |
| 2021     | 8                 | Female     | Dachshund                      | HI           |
| 2021     | 4                 | Female     | Terrier Mix                    | CO           |
| 2021     | 4                 | Female     | Labrador Retriever             | PA           |
| 2021     | 4                 | Male       | Golden Retriever               | PA           |
| 2021     | 0.91              | Female     | Dachshund                      | CO           |

|      |      |        |                           |    |
|------|------|--------|---------------------------|----|
| 2021 | 5    | Female | Mixed Breed               | CA |
| 2021 | 10   | Female | Australian Shepherd       | VA |
| 2021 | 0.83 | Female | Miniature Poodle Mix      | NY |
| 2021 | 10   | Female | Basset Hound              | FL |
| 2021 | 2    | Male   | American Eskimo           | VA |
| 2021 | 10   | Male   | Pomeranian                | GA |
| 2021 | 5    | Male   | Australian Cattle Dog Mix | NV |
| 2021 | 0.41 | Female | Poodle Mix                | CO |
| 2021 | 11   | Male   | Mixed Breed               | PA |
| 2021 | 2    | Male   | Mixed Breed               | PA |
| 2021 | 4    | Female | German Shepherd           | CO |
| 2021 | 16   | Male   | Yorkshire Terrier         | VA |
| 2021 | 9    | Female | Labrador Retriever Mix    | KY |
| 2021 | 4    | Male   | German Shepherd           | HI |
| 2021 | 12   | Female | Australian Shepherd       | PA |
| 2021 | 3    | Female | Poodle Miniature          | HI |
| 2021 | 0.37 | Female | German Shorthair Pointer  | HI |
| 2021 | 1    | Female | Aussie doodle             | VA |
| 2021 | 3.5  | Male   | Pembroke Welsh Corgi Mix  | NY |
| 2021 | 8    | Female | Dachshund                 | HI |
| 2021 | 10   | Male   | Yorkshire Terrier         | TN |
| 2021 | 6    | Male   | Bichon Frise              | MA |
| 2021 | 0.41 | Male   | Chihuahua Mix             | FL |
| 2021 | 2    | Male   | Great Pyrenees            | PA |
| 2021 | 8    | Female | German Shepherd           | IN |
| 2021 | 1    | Female | Pembroke Welsh Corgi      | NY |
| 2021 | 4    | Female | Pit Bull                  | AL |
| 2021 | 11   | Female | French Bulldog            | MN |
| 2021 | 14   | Male   | Miniature Pinscher        | FL |
| 2021 | 0.58 | Male   | Mixed Breed               | NY |
| 2021 | 1    | Female | Jindo Mix                 | WA |
| 2021 | 8    | Female | Chihuahua Mix             | NY |
| 2021 | 3    | Female | Labrador Retriever        | AL |
| 2021 | 8    | Female | Shih Tzu                  | TX |
| 2021 | 6    | Male   | Mixed Breed               | WY |
| 2021 | 1    | Male   | Golden Retriever          | FL |
| 2021 | 10   | Female | Golden Retriever          | GA |
| 2021 | 1    | Male   | Chihuahua Mix             | MS |
| 2021 | 2    | Male   | Labrador Retriever        | NC |
| 2021 | 11   | Male   | Pomeranian                | PA |
| 2021 | 3    | Female | Australian Shepherd       | TX |
| 2021 | 5    | Female | Border Collie             | WA |
| 2021 | 9    | Female | Miniature Pinscher        | PA |
| 2021 | 2.5  | Male   | Golden Retriever          | NC |
| 2021 | 1.83 | Female | Pomeranian                | NY |
| 2021 | 10   | Female | Schnauzer                 | GA |
| 2021 | 9    | Female | Pit Bull Mix              | ID |
| 2021 | 3.5  | Male   | German Shorthair Pointer  | FL |
| 2021 | 8    | Male   | Labrador Retriever        | IN |
| 2021 | 7    | Female | Miniature Schnauzer       | HI |
| 2021 | 4    | Female | Belgian Malinois          | FL |
| 2021 | 2    | Female | Labrador Retriever Mix    | AK |
| 2021 | 1    | Female | German Shepherd           | NV |
| 2021 | 3    | Male   | Cardigan Welsh Corgi      | PA |
| 2021 | 10   | Male   | Havanese                  | PA |
| 2021 | 13   | Male   | Mixed Breed               | PA |
| 2021 | 5    | Female | Boston Terrier            | PA |
| 2021 | 1    | Female | Maltese                   | PA |
| 2021 | 6    | Female | Golden Retriever          | PA |
| 2021 | 6.5  | Male   | Labrador Retriever Mix    | FL |
| 2021 | 3.5  | Male   | Dachshund                 | NY |
| 2021 | 1.41 | Male   | Maltese                   | NY |
| 2021 | 0.91 | Female | Chow Chow                 | GA |
| 2021 | 0.58 | Female | Parson Russell Terrier    | PA |
| 2021 | 2    | Male   | Chihuahua Mix             | VA |

|      |      |        |                        |    |
|------|------|--------|------------------------|----|
| 2021 | 0.66 | Male   | Shepherd Mix           | CO |
| 2021 | 5    | Female | Labrador Retriever Mix | NC |
| 2021 | 5    | Female | Poodle                 | WA |
| 2021 | 6    | Female | German Shepherd Mix    | MO |
| 2021 | 12   | Female | Boxer                  | FL |
| 2021 | 0.5  | Female | Labrador Retriever     | NY |
| 2021 | 0.33 | Male   | Border Collie          | DE |
| 2021 | 9.58 | Female | Cocker Spaniel         | GA |
| 2021 | 12   | Male   | Miniature Poodle       | IL |
| 2021 | 19   | Female | Chihuahua              | FL |
| 2021 | 1    | Female | Papillion              | AL |
| 2021 | 11   | Female | Mixed Breed            | GA |
| 2020 | 4    | Male   | Shepherd               | AR |
| 2020 | 2    | Female | Pembroke Welsh Corgi   | WI |
| 2020 | 0.75 | Female | Dalmatian              | UT |
| 2020 | 8    | Female | Miniature Schnauzer    | VT |
| 2020 | 4    | Male   | Miniature Schnauzer    | VA |
| 2020 | 2    | Female | Golden Retriever       | OK |
| 2020 | 8    | Female | Labrador Retriever Mix | VA |
| 2020 | 5    | Female | Boxer Mix              | FL |
| 2020 | 7.66 | Female | Labrador Retriever Mix | AL |
| 2020 | 9.33 | Male   | Labrador Retriever Mix | AL |
| 2020 | 3.16 | Male   | Labrador Retriever Mix | AL |
| 2020 | 0.91 | Male   | Siberian Husky         | NY |
| 2020 | 3    | Male   | French Bulldog         | MD |
| 2020 | 4.5  | Male   | Poodle                 | CT |
| 2020 | 0.66 | Female | Poodle                 | TN |
| 2020 | 0.41 | Female | Boston Terrier Mix     | TX |
| 2020 | 11   | Male   | Cocker Spaniel         | WA |
| 2020 | 6    | Male   | Australian Shepherd    | KY |
| 2020 | 12   | Female | Beagle Mix             | TN |
| 2020 | 0.5  | Female | French Bulldog         | MS |
| 2020 | 2    | Male   | Golden Retriever       | NE |
| 2020 | 2    | Female | Labradoodle            | MI |
| 2020 | 4    | Female | Yorkshire Terrier      | TX |
| 2020 | 0.33 | Male   | Goldendoodle           | TX |
| 2020 | 5    | Male   | American Bulldog       | ID |
| 2020 | 2    | Female | Yorkshire Terrier      | TX |
| 2020 | 0.75 | Female | Brittany Spaniel       | AL |
| 2020 | 0.5  | Female | Australian Shepherd    | WA |
| 2020 | 7    | Female | Border Collie Mix      | TX |
| 2020 | 11   | Male   | Pug                    | MT |
| 2020 | 2    | Male   | Siberian Husky         | IL |
| 2020 | 1    | Female | Pembroke Welsh Corgi   | MO |
| 2020 | 1    | Female | Pomeranian             | WA |
| 2020 | 1.5  | Female | Dalmatian              | TX |
| 2020 | 6.75 | Female | Jack Russell Terrier   | IL |
| 2020 | 6    | Female | Toy Poodle             | MS |
| 2020 | 10   | Male   | Chihuahua              | MS |
| 2020 | 2    | Male   | Poodle Mix             | MA |
| 2020 | 9    | Male   | Dachshund Mix          | TX |
| 2020 | 2.08 | Female | Hound                  | WA |
| 2020 | 0.5  | Male   | Mixed Breed            | OK |
| 2020 | 7    | Female | Labrador Retriever Mix | TN |
| 2020 | 8    | Female | Border Collie          | TN |
| 2020 | 13.5 | Female | Jack Russell Terrier   | TN |
| 2020 | 7    | Female | Siberian Husky         | WA |
| 2020 | 3    | Female | Great Dane             | WA |
| 2020 | 11   | Female | Poodle                 | TN |
| 2020 | 3    | Male   | Rat Terrier            | IL |
| 2020 | 4    | Female | Siberian Husky         | NC |
| 2020 | 1    | Male   | Goldendoodle           | TX |
| 2020 | 2    | Male   | Chihuahua              | TN |
| 2020 | 0.91 | Male   | Rottweiler             | NC |
| 2020 | 13   | Male   | Miniature Schnauzer    | OK |

|      |      |                |                                |    |
|------|------|----------------|--------------------------------|----|
| 2020 | 9    | Female         | Kelpie                         | ID |
| 2020 | 1    | Female         | Great Dane                     | MO |
| 2020 | 7    | Male           | Great Pyrenees Mix             | TN |
| 2020 | 7    | Female         | Yorkshire Terrier              | KY |
| 2019 | 3    | Male           | Rat Terrier                    | IL |
| 2019 | 8    | Male           | Shih Tzu                       | LA |
| 2019 | 7    | Male           | Terrier Mix                    | UT |
| 2019 | 0.91 | Male           | Labrador Retriever Mix         | MO |
| 2019 | 2    | Female         | Blue Lacy                      | TX |
| 2019 | 6.16 | Male           | Labrador Retriever Mix         | MS |
| 2019 | 2    | Female         | Weimaraner                     | MO |
| 2019 | 1.66 | Male           | American Bully                 | LA |
| 2019 | 0.75 | Male           | Labrador Retriever Mix         | MO |
| 2019 | 2    | Male           | Beagle Mix                     | IA |
| 2019 | 1    | Female         | German Shepherd Mix            | IN |
| 2019 | 12   | Male           | Belgian Tervuren               | IL |
| 2019 | 2    | Male           | Schnauzer                      | KY |
| 2019 | 0.91 | Male           | Shih Tzu Mix                   | RI |
| 2018 | 15   | Female         | Mixed Breed                    | TN |
| 2018 | 9    | Female Spayed  | West Highland White Terrier    | KY |
| 2018 | 2    | Female Spayed  | Poodle                         | TX |
| 2018 | 8    | Female         | Poodle Miniature               | TN |
| 2018 | 8    | Female Spayed  | Poodle                         | IL |
| 2018 | NS   | Female Spayed  | Jack Russell Terrier           | KY |
| 2017 | 5    | Female Spayed  | Maltese                        | TN |
| 2017 | 2    | Female Spayed  | German Shepherd Mix            | TX |
| 2017 | 4    | Male Castrated | Poodle Miniature               | KY |
| 2017 | 9    | Male Castrated | Poodle Mix                     | NJ |
| 2017 | 11   | Female Spayed  | Labrador Retriever Mix         | TN |
| 2017 | 8    | Male Castrated | Boston Terrier                 | TN |
| 2017 | 3    | Male Castrated | Goldendoodle                   | TN |
| 2017 | 2    | Female Spayed  | Goldendoodle                   | TN |
| 2017 | 9    | Male Castrated | Rottweiler                     | TN |
| 2017 | 8    | Female Spayed  | Maltese                        | TN |
| 2017 | 14   | Male Castrated | Dachshund Mix                  | KY |
| 2017 | 9    | Female Spayed  | Shetland Sheepdog              | TN |
| 2017 | 2    | Male Castrated | Chihuahua Mix                  | NC |
| 2017 | 1    | Female         | American Staffordshire Terrier | TN |
| 2017 | 11   | Male Castrated | Husky Mix                      | TN |
| 2017 | 13   | NS             | Shih Tzu                       | IL |
| 2017 | 2    | Male Castrated | Chihuahua Mix                  | NC |
| 2017 | NS   | Female Spayed  | Bichon Frise                   | TN |
| 2017 | 13   | Female Spayed  | English Cocker Spaniel         | TN |
| 2017 | 4    | Female Spayed  | Yorkshire Terrier              | KY |
| 2017 | 4    | Female Spayed  | Yorkshire Terrier              | KY |
| 2017 | 6    | Female Spayed  | Labrador Retriever Mix         | TN |
| 2017 | 6    | Male Castrated | Labrador Retriever Mix         | TN |

NS indicates the sex of the dog was not specified.
